# Supplementary material for: Community Stakeholders’ Perspectives on Intimate Partner Violence during Pregnancy—A Qualitative Study from Ethiopia
Source: Int J Environ Res Public Health. 2019 Nov 25;16(23):4694. doi: 10.3390/ijerph16234694 (PMC6926756; doi:10.3390/ijerph16234694)
Supplement: Supplementary file 1 [file ijerph-16-04694-s001.pdf]

**Table S1.** Procedures/steps of data analysis in Atlas Ti, based on the content analysis, and framed by the theory of Gender and Power

| Steps                                     | procedures and descriptions                                                                                                                                                                                                                        |
|-------------------------------------------|----------------------------------------------------------------------------------------------------------------------------------------------------------------------------------------------------------------------------------------------------|
| Familiarizations                          | All transcripts were read to make a general sense out of it and reflect on the overall meaning                                                                                                                                                     |
| Creating and file naming                  | Create file name and save the project (under new hermeneutic unit/analysis project) and add document in the library                                                                                                                                |
| Importing files                           | Import all transcripts (#16 IDIs transcripts lined up under P-Docs)                                                                                                                                                                                |
| Condensed meaning unites                  | Open each transcripts turn by turn and create meaning unites that gives sense                                                                                                                                                                      |
| Coding                                    | Create codes/label (under code manager)<br>Highlight quotations for each transcripts, then drag and drop codes for each respective quotations, or create new codes as necessary                                                                    |
| Categorizing                              | Categorize/create family codes (themes) based on similarity<br>Write comments under codes and memos under family as appropriate                                                                                                                    |
| Concept mapping                           | Semantic link/networking codes to codes help us to have a concept maps, and quotation to quotations to have an argument maps                                                                                                                       |
| Producing outputs (categories /families)  | Open code manager, click on each codes, click on outputs and save each outputs of the codes of categories /families                                                                                                                                |
| Data familiarization                      | For more data familiarization, transcripts were read repeatedly, alongside listening to records of recordings and /or reading field-notes                                                                                                          |
| Result (describing themes and quotations) | In the result section-a thorough description of each output of categories under the respective themes, based on the content analysis method selected for this specific analysis. Supporting quotations were included within the respective themes. |
| Discussion                                | In the discussion-interpret results; discuss them in light of relevant literatures within the field of IPV as well as Connell's theory of gender and power.                                                                                        |
